# Supplementary material for: miRNA array screening reveals cooperative MGMT-regulation between miR-181d-5p and miR-409-3p in glioblastoma
Source: PubMed Central journal article supplement (PMC5053720; doi:10.18632/oncotarget.8618), 2016-04-05
Supplement: oncotarget-07-28195-s001.pdf [file oncotarget-07-28195-s001.pdf]

## miRNA array screening reveals cooperative MGMT-regulation between miR-181d-5p and miR-409-3p in glioblastoma

### Supplementary Materials

**Supplementary Table S1: MicroRNAs differentially expressed between MGMT-low and MGMT-high glioblastomas**

| microRNA        | <i>p</i> -value | Fold change | Regulation high/low | MGMT high (log2) | MGMT low (log2) |
|-----------------|-----------------|-------------|---------------------|------------------|-----------------|
| hsa-miR-124-3p  | 0.015034        | 16.0        | down                | 3.80             | 7.80            |
| hsa-miR-127-3p  | 0.041007        | 17.6        | down                | 1.27             | 5.41            |
| hsa-miR-129-5p  | 0.023617        | 2.7         | down                | 3.24             | 4.65            |
| hsa-miR-181b-5p | 0.013845        | 2.6         | down                | 6.16             | 7.53            |
| hsa-miR-181c-3p | 0.021823        | 19.1        | down                | -1.70            | 2.55            |
| hsa-miR-381-3p  | 0.033114        | 11.1        | down                | -2.29            | 1.19            |
| hsa-miR-409-3p  | 0.011395        | 47.9        | down                | -1.49            | 4.09            |
| hsa-miR-4310    | 0.036081        | 13.6        | up                  | 0.83             | -2.93           |
| hsa-miR-616-3p  | 0.008522        | 8.9         | up                  | 1.05             | -2.10           |

**Supplementary Table S2: Expression of MGMT mRNA and candidate miRs in T98G, U251 and U373 glioblastoma cell lines**

|             | Glioblastoma cell lines |       |       |
|-------------|-------------------------|-------|-------|
|             | T98G                    | U251  | U373  |
| miR-127-3p  | 0.85                    | 0.09  | 0.31  |
| miR-124-3p  | 9.72                    | 2.24  | 8.69  |
| miR-409-3p  | 0.2                     | 0.04  | 0.11  |
| miR-181d-5p | 16.39                   | 26.99 | 55.29 |
| miR-767-3p  | 0                       | 0     | 0     |
| miR-648     | 0.03                    | 0.02  | 0.06  |
| MGMT mRNA   | 0.35                    | 0.01  | 0.01  |

% expression relative to miR-U6 and GAPDH mRNA for microRNAs and MGMT mRNA, respectively.

**Supplementary Table S3: Sequences of mature hsa-miR-124**

| microRNA       | sequence               | miRBase accession |
|----------------|------------------------|-------------------|
| hsa-miR-124-5p | CGUGUUCACAGCGGACCUUGAU | MIMAT0004591      |
| hsa-miR-124-3p | UAAGGCACGCGGUGAAUGCC   | MIMAT0000422      |

Sequence as reported in miRBase database (www.mirbase.org).

**Supplementary Table S4: Survival analysis of candidate miRNAs in the TCGA and CGGA databases**

|                      | miR-181d-5p | miR-409-3p | miR-124-3p | miR-127-3p |
|----------------------|-------------|------------|------------|------------|
| <b>TCGA database</b> |             |            |            |            |
| <i>p</i> value       | 0.003 (**)  | 0.467      | 0.997      | 0.577      |
| <b>CGGA database</b> |             |            |            |            |
| <i>p</i> value       | 0.004 (**)  | 0.668      | 0.575      | 0.885      |

TCGA database analysis from 199 patients affected by glioblastoma. CGGA database analysis from 82 patients affected by glioblastoma. Statistical significance at 0.05 (\*) or 0.01 (\*\*) levels, calculated as reported in Zhang et al. Neuro-Oncol. 2012; 14:712–9.

**Supplementary Table S5: Regression analysis of candidate miRs versus MGMT mRNA in TCGA and CGGA databases**

|                      | miR-181d-5p | miR-409-3p | miR-124-3p | miR-127-3p |
|----------------------|-------------|------------|------------|------------|
| <b>TCGA database</b> |             |            |            |            |
| <i>r</i>             | −0.218      | 0.073      | −0.011     | 0.025      |
| <i>p</i> value       | 0.006 (**)  | 0.363      | 0.882      | 0.747      |
| <b>CGGA database</b> |             |            |            |            |
| <i>r</i>             | −0.193      | −0.008     | −0.08      | −0.032     |
| <i>p</i> value       | 0.04 (*)    | 0.30       | 0.45       | 0.54       |

TCGA database analysis from 158 patients affected by glioblastoma. CGGA database analysis from 59 patients affected by glioblastoma. Two-tailed statistical significance at 0.05 (\*) and 0.01 (\*\*) is reported.

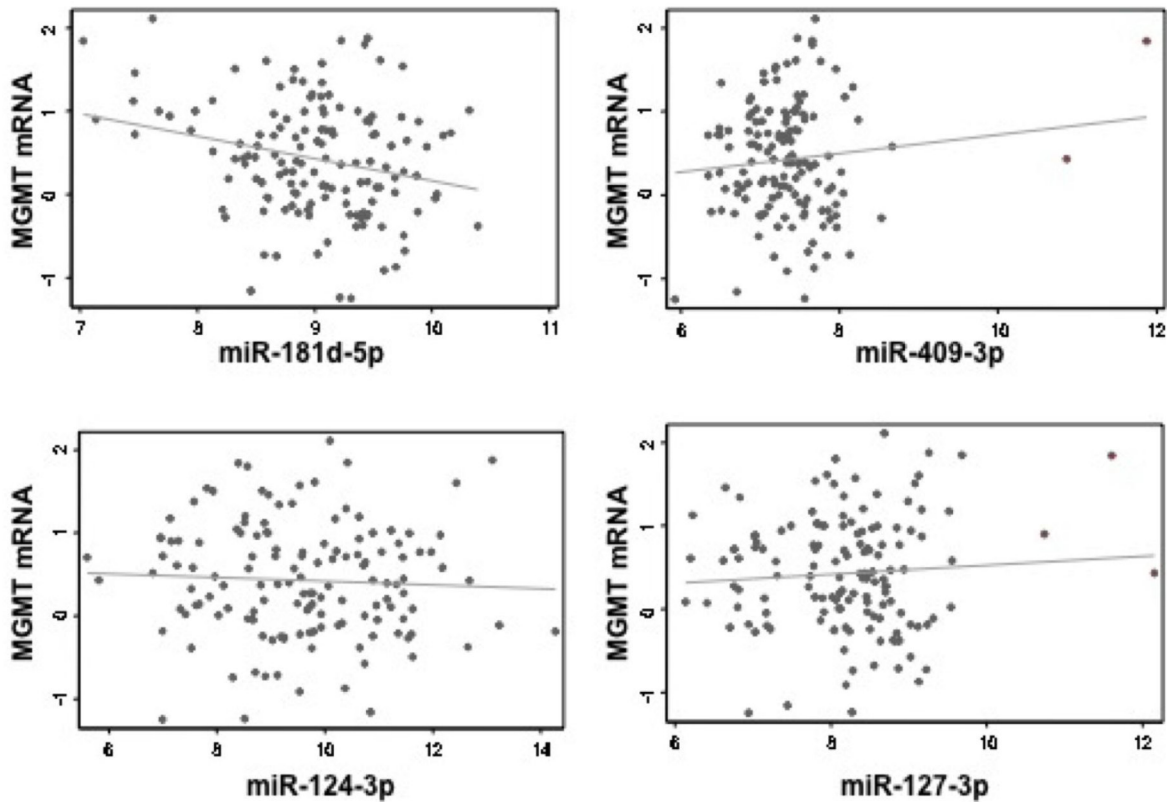

Supplementary Figure S1: Regression plots of miR-181d, -409-3p, 124-3p and 127-3p versus MGMT mRNA in glioblastoma samples from TCGA database. Regression values and statistical significance are reported in Supplementary Table S5.

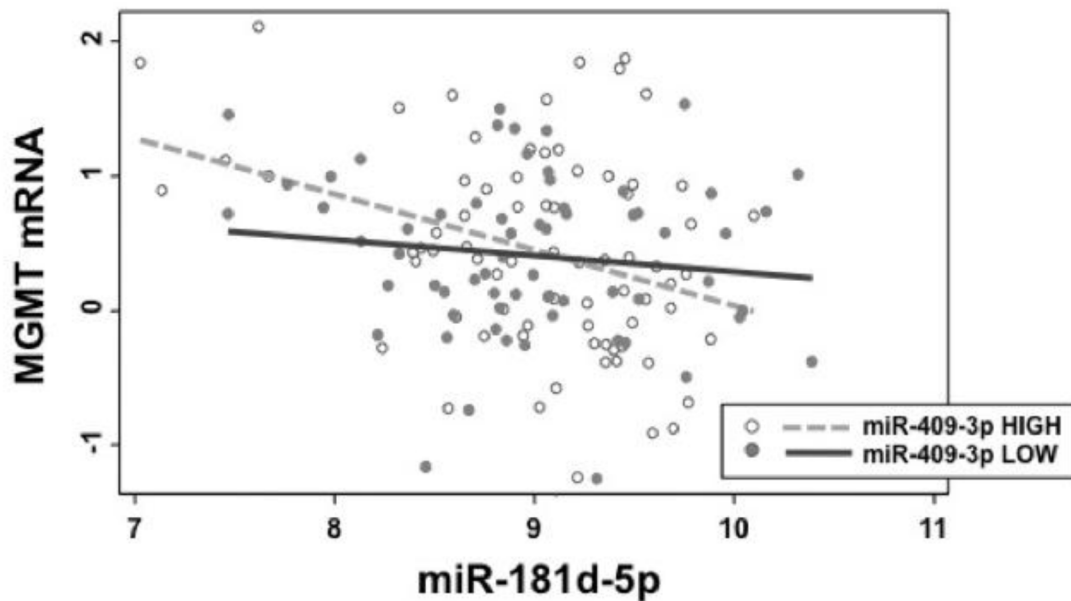

Supplementary Figure S2: Regression plot of miR-181d on MGMT mRNA as a function of high or low levels of miR-409-3p in glioblastoma samples from TCGA database. Interaction between miR-181d and miR-409-3p versus MGMT mRNA was found statistically significant ( $p = 0.029$ ) as tested by multiple regression analysis. MiR-181d and MGMT mRNA values were plotted for miR-409-3p values above (HIGH) or below (LOW) the median value of miR-409-3p. Regression significance of MGMT mRNA with miR-181d for HIGH miR-409-3p was  $p = 0.017$  (\*) and for LOW miR-409-3p was  $p = 0.313$ .
